# Supplementary material for: The Ustilago maydis Effector Pep1 Suppresses Plant Immunity by Inhibition of Host Peroxidase Activity
Source: PLOS journal article supplement (doi:10.1371/journal.ppat.1002684), 2012-05-10
Supplement: S2 (10.1371/journal.ppat.1002684.s002) [file journal.ppat.1002684.s002]

**Figure S2**

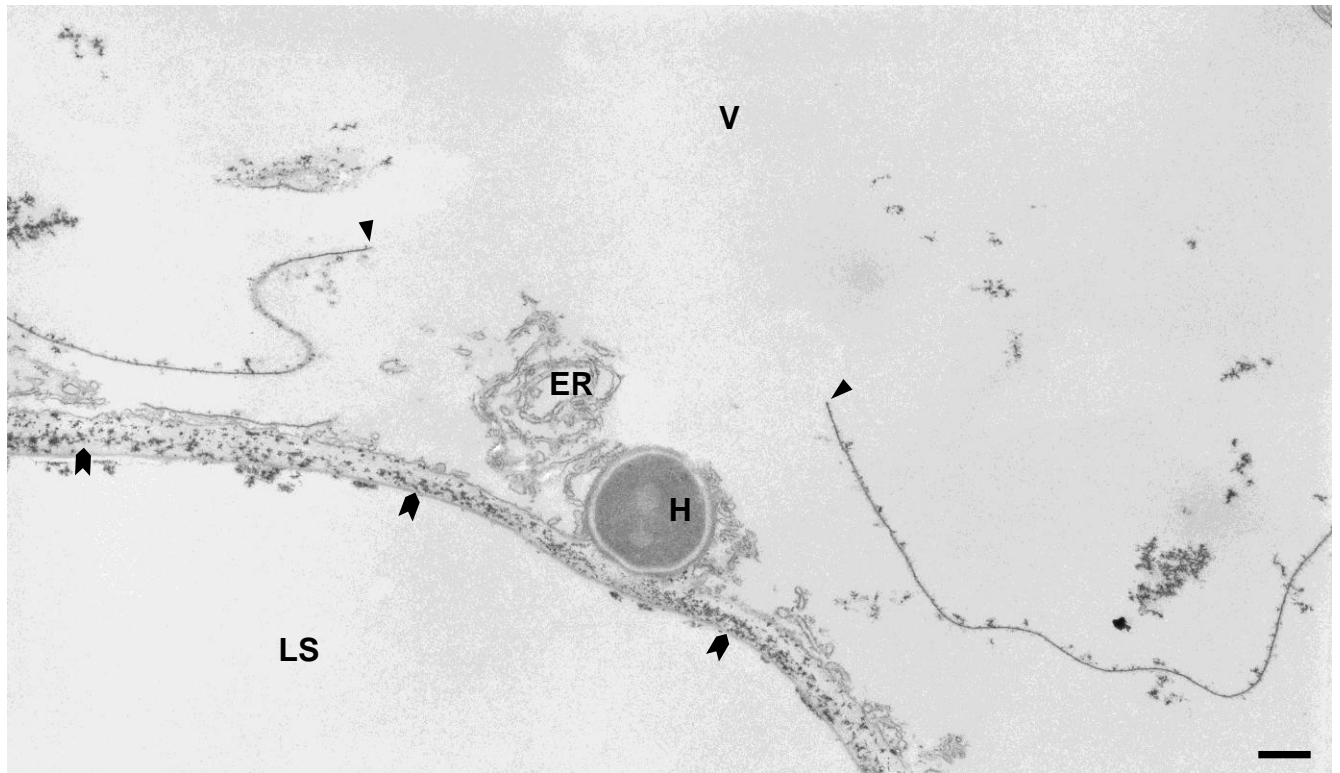

**Supplementary Figure 2. SG200 $\Delta$ pep1 infected cells undergo HR.**

TEM image of a maize epidermis cell undergoing HR after penetration by SG200 $\Delta$ pep1. Note the ruptured tonoplast (arrow heads) and severe oxidative stress indicated by CeCl<sub>3</sub> accumulation in the cell wall (chevrons). H: *Ustilago maydis* hypha, ER: endoplasmic reticulum, V: vacuole, LS: leaf surface. Bar: 1  $\mu$ m.
