# Supplementary material for: The Ustilago maydis Effector Pep1 Suppresses Plant Immunity by Inhibition of Host Peroxidase Activity
Source: PLOS journal article supplement (doi:10.1371/journal.ppat.1002684), 2012-05-10
Supplement: S4 (10.1371/journal.ppat.1002684.s004) [file journal.ppat.1002684.s004]

Figure S4

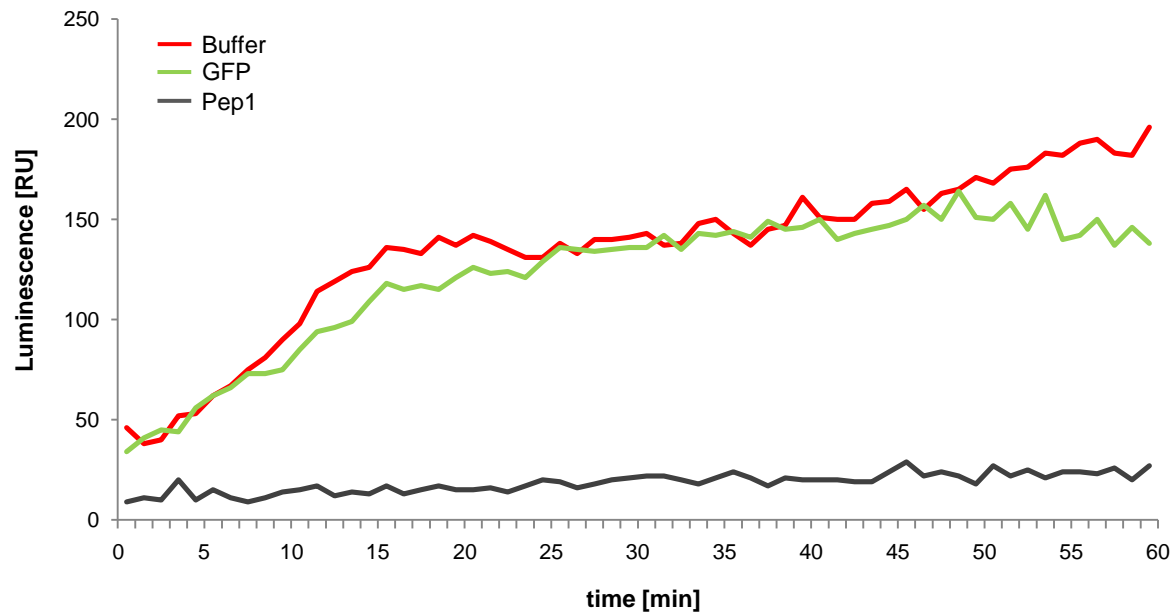

**Supplementary Figure 4. Pep1 inhibits maize oxidative burst triggered by heat inactivated *Ustilago maydis* cells.** Luminol based graphical representation of  $H_2O_2$  production in maize leaf discs, elicited by the addition of  $2 \times 10^8$  c/ml heat inactivated cells of *Ustilago maydis* strain SG200 at time point 1 min. Concentrations of recombinant Pep1 and GFP proteins: 10  $\mu$ M.
