# Supplementary material for: The Ustilago maydis Effector Pep1 Suppresses Plant Immunity by Inhibition of Host Peroxidase Activity
Source: PLOS journal article supplement (doi:10.1371/journal.ppat.1002684), 2012-05-10
Supplement: S7 (10.1371/journal.ppat.1002684.s007) [file journal.ppat.1002684.s007]

# Figure S7

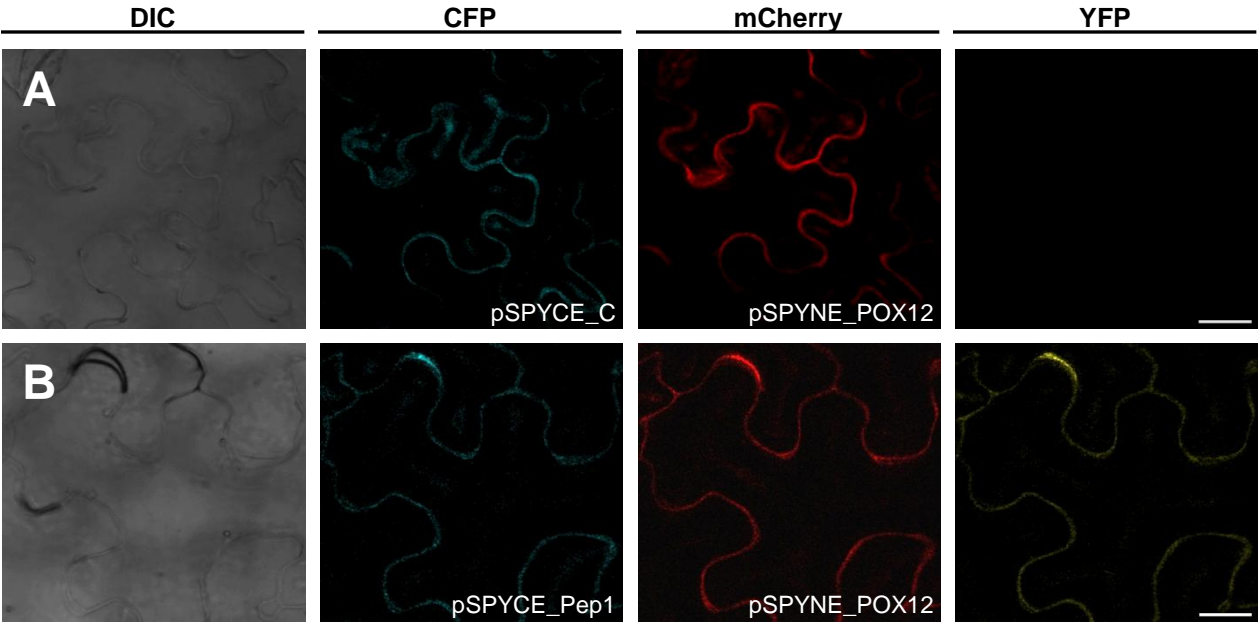

**Supplementary Figure 7. *In vivo* visualization of a direct interaction of Pep1 with POX12.**  
**A:** A cell co-expressing pSPYCE\_C and pSPYNE\_POX12. Blue and red channels show apoplastic localization of the respective signals. No fluorescence complementation is observed in the YFP channel. **B:** A *N. benthamiana* cell co-expressing pSPYCE\_Pep1 and pSPYNE\_POX12. Both signals co-localize in the apoplast. The YFP channel exhibits YFP fluorescence with the same localization pattern indicating a restoration of the YFP complex due to direct interaction of POX12 and Pep1. Bars: 25  $\mu$ m.
